# Correlated signatures of social behavior in cerebellum and anterior cingulate cortex

Sung Won Hur <sup>\* 1,4</sup>, Karen Safaryan <sup>\* 1</sup>, Long Yang <sup>2</sup>, Hugh T Blair <sup>3</sup>, Sotiris C Masmanidis <sup>2</sup>, Paul J Mathews <sup>4,5</sup>, Daniel Aharoni <sup># 1</sup>, Peyman Golshani <sup># 1</sup>

<sup>1</sup> Department of Neurology, DGSOM, University of California Los Angeles, Los Angeles, California, USA.

<sup>2</sup> Department of Neurobiology, University of California Los Angeles, Los Angeles, California, USA.

<sup>3</sup> Department of Psychology, University of California Los Angeles, Los Angeles, California, USA.

<sup>4</sup> The Lundquist Institute for Biomedical Innovation, Harbor-UCLA Medical Center, Torrance, California, USA.

<sup>5</sup> Department of Neurology, Harbor-UCLA Medical Center, Torrance, California, USA.

\* These authors contributed equally to this work

# Corresponding authors

## **Abstract**

The cerebellum has been implicated in the regulation of social behavior. Its influence is thought to arise from communication, via the thalamus, to forebrain regions integral in the expression of social interactions, including the anterior cingulate cortex (ACC). However, the signals encoded or the nature of the communication between the cerebellum and these brain regions remains poorly understood. Here, we describe an approach that overcomes technical challenges in exploring the coordination of distant brain regions at high temporal and spatial resolution during social behavior. We developed the E-Scope, an electrophysiology-integrated miniature microscope, to synchronously measure extracellular electrical activity in the cerebellum along with calcium imaging of the ACC. This single coaxial cable device combined these data streams to provide a powerful tool to monitor the activity of distant brain regions in freely behaving animals. During social behavior, we recorded the spike timing of multiple single units in cerebellar right Crus I (RCrus I) Purkinje cells (PCs) or dentate nucleus (DN) neurons while synchronously imaging calcium transients in contralateral ACC neurons. We find that during social interactions, a significant subpopulation of cerebellar PCs were robustly inhibited, while most modulated neurons in the DN were activated. As expected, we find that there are higher correlations in the activity of cerebellar and ACC neurons that are similarly excited or inhibited by social interaction than in the activity of those modulated in an opposing manner. Surprisingly, these distinctions in correlations largely disappear when only non-social bouts were analyzed, suggesting that cerebellar-cortical interactions were social behavior specific. Our work provides new insights into the complexity of cerebellar activation and co-modulation of the ACC during social behavior, and a valuable open-source tool for simultaneous, multimodal recordings in freely behaving mice.

## **Introduction**

The cerebellum, a brain region traditionally associated with motor coordination, has been increasingly recognized as a region that participates in the coordination of social cognition and behavior. Early studies showed that cerebellar stroke or injury could result in personality changes, blunted affect, and even antisocial behavior (Schmahmann, 1998a). More recent studies using neuroimaging and behavioral assays indicate the cerebellum contributes to elements of social cognition including “mentalizing” or “mirroring” (van Overwalle et al., 2020).

Studies in animal models have strengthened the link between the cerebellum and social behavior. Modulating the neural activity of cerebellar Purkinje cells (PCs) through the insertion of disease related gene mutations or chemogenetic alterations of firing rate reduced social interactions (Badura et al., 2018; Kelly et al., 2020). Moreover, optogenetic suppression of cerebellar output to the forebrain or midbrain, especially cerebellar neurons projecting to the ventral tegmental area (VTA), decreased social interest (Carta et al., 2019). Among all cerebellar regions, modulation of

the right Crus I (RCrus I) of the cerebellar cortex had the most significant impact on the expression of social behavior (Stoodley et al., 2017).

However, it has yet to be established how the cerebellar output of the RCrus I region contributes to social behavior. It is likely that the cerebellum, through cerebellar communication with forebrain areas like the anterior cingulate cortex (ACC), provides signals important in coordinating aspects of social interaction. These socially-relevant brain regions have known multisynaptic connectivity, in which the RCrus I PC axons project to the dentate nucleus (DN), which in turn innervates the ventromedial thalamic neurons (Badura et al., 2018; Kelly et al., 2020). The cerebellum's interactions with the ACC are of interest as targeted lesions in non-human primates and most recently, selective gene deletion in mice, result in decreased sociability and reduced recognition of social and emotional cues (Devinsky et al., 1995; B. Guo et al., 2019; Hadland et al., 2003). While both the cerebellum and ACC play important roles in the regulation of social behavior, how these regions interact at the neural and systems levels to drive social behavior is still poorly understood.

Here, we developed the E-Scope, a novel device that can perform simultaneous electrophysiological and calcium imaging recordings of cerebellum and ACC, respectively. We have, for the first time, recorded the activity of RCrus I PC or DN neurons in synchrony with recordings from large populations of ACC neurons during social interaction. Our results demonstrate that PCs and DN neurons are mostly antagonistically modulated by social interaction, with most PCs inhibited and DN neurons excited during interaction bouts. Furthermore, we find that there is a higher correlation between cerebellar and ACC neurons that are similarly excited or inhibited by social interaction than those modulated in an opposing manner, but that these differences disappear during non-social bouts. This highlights brain-state specific modulation of social circuits across distant brain regions, critical for social interaction.

## **Results**

### **E-Scope: A miniaturized calcium imaging microscope with integrated dense electrode technology for synchronous acquisition of neural activity across distant regions of the brain**

Limitations in the spatial and temporal resolution of current neural monitoring technologies have hampered our ability to systematically examine how interconnected brain regions communicate to control complex behaviors. To address these limitations, we have developed a novel device based on the open-sourced UCLA Miniscope to synchronously measure single cell activity at or near spike-time resolution across distant brain regions in freely behaving mice. We have integrated a miniaturized microscope, which performs calcium imaging, with dense electrode electrophysiological recording, allowing simultaneous recordings from two remote brain regions in a freely behaving mouse (**Figure 1A**). This "E-Scope" uses a single coaxial cable that minimally impacts animal movement to integrate both imaging and electrophysiological data streams along with the Miniscope's power. The electrophysiological component of this dual neural activity monitoring system is especially advantageous for brain regions with high basal firing rate neurons, such as the cerebellum, where activity may be obscured or not amenable to calcium imaging.

The E-Scope builds off our previous open-source wired Version 3 miniaturized microscope (Miniscope V3). Using its modular capability, we incorporated 32 channel electrophysiology sampling capabilities with the ability to support various configurations and geometries of silicon probes and tetrodes. The entire assembly weighs less than 4.5 g. For performing electrophysiological recordings, we used a two-shank, 64 channel silicon probe (64H with 32 channels activated) (Yang et al., 2020).

We used the E-Scope to investigate correlations in the activity of RCrus I cerebellar PCs or DN neurons with population activity of contralateral anterior cingulate cortex (ACC) neurons during

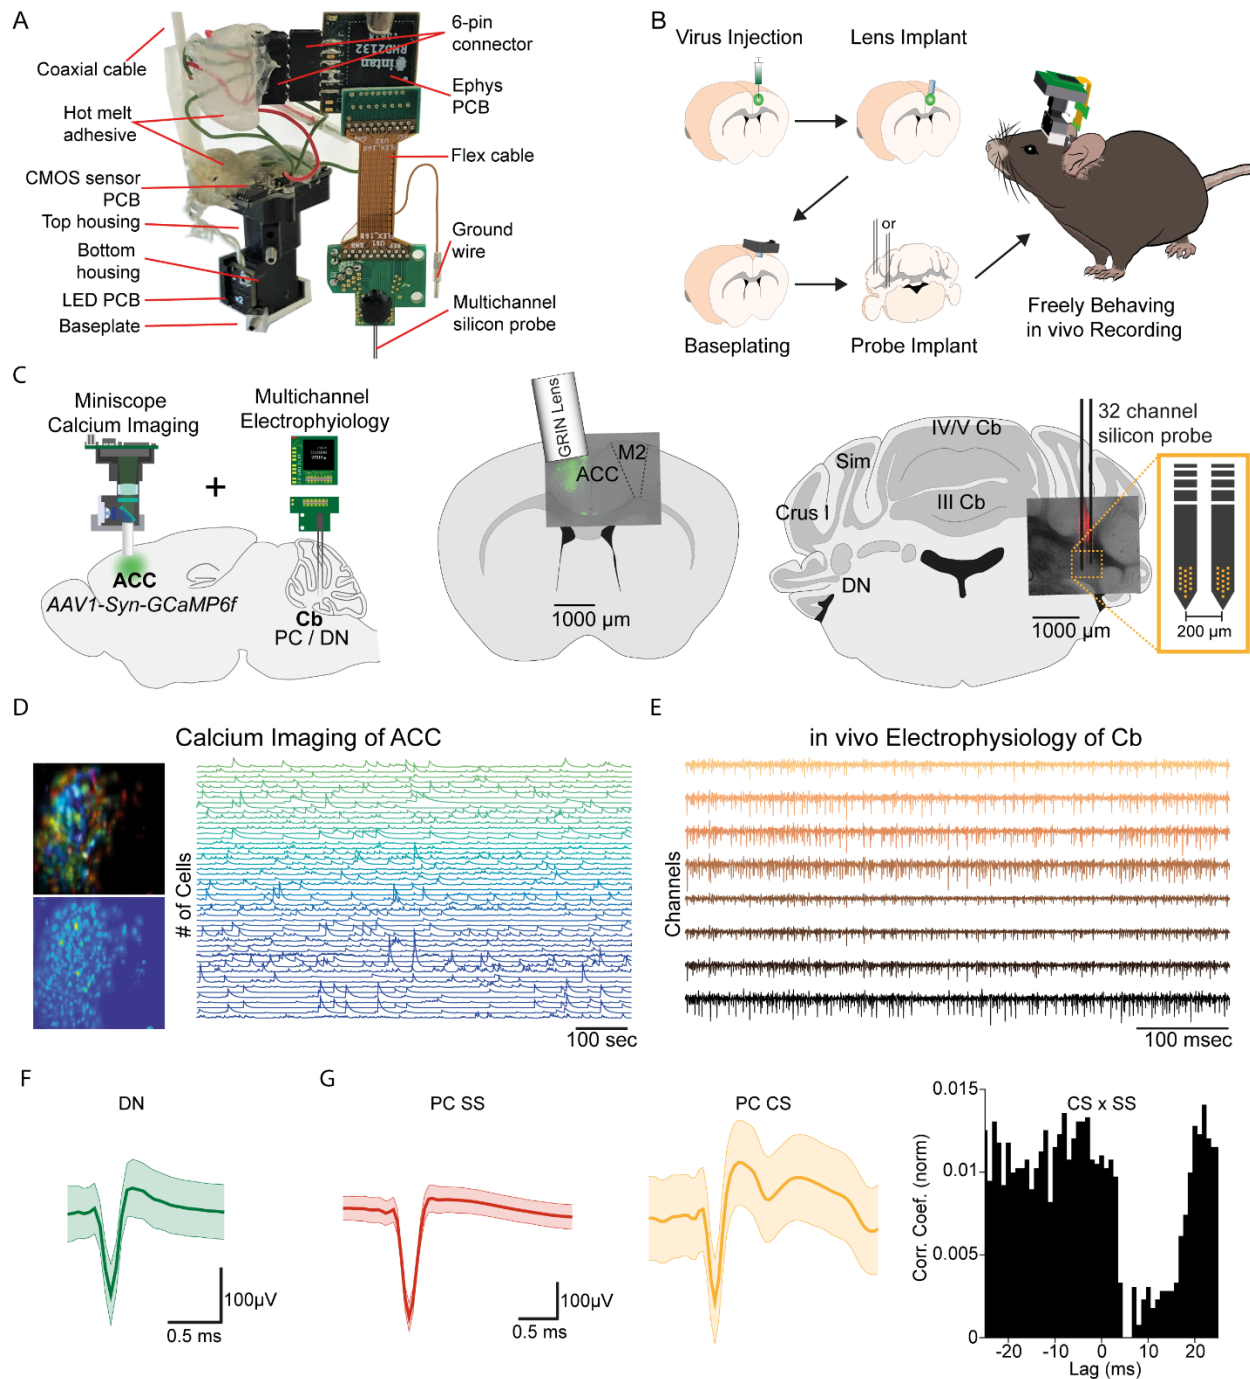

**Figure 1. E-Scope: an integrated device allowing synchronous calcium imaging of anterior cingulate cortex and electrophysiological recordings in cerebellum.**

(A) Photograph of E-Scope hardware. The multichannel silicon probe (32 channels) connects to the custom Ephys PCB. The Ephys PCB is connected to the CMOS sensor PCB of the Miniscope via a 6-pin connector. The electrophysiology and image data streams are both conveyed through the coaxial cable. (B) Illustration of the process for implanting the E-Scope. (C) Illustrations and photomicrographs showing the location of AAV1-Syn-GCaMP6f virus injection in ACC (left, middle) and multichannel probe implant in the dentate nucleus of the cerebellum (left, right). (D) Pseudo-color (top left) and averaged activity heatmap from calcium imaging ACC neurons segmented using CNMF-E (bottom left). Calcium signals of ACC neurons (right). (E) In vivo single unit electrophysiology recording of PCs in the cerebellum (Cb). (F) Average spike waveform of a dentate nucleus (DN) neuron. (G) Average simple spike (SS) waveform (left) and average complex spike (CS) waveform (middle) of a PC. Cross-correlogram of simple spikes and complex spikes shows the pause in simple spike activity after a complex spike (right).

social behavior. To monitor ACC population activity, we injected an AAV virus to express the genetically encoded calcium indicator GCaMP6f in the left ACC. After a one-week recovery period, a 1 mm diameter GRIN lens (Inscopix; PN 130-000143) was implanted at the site of injection at a 10 degree angle. After a subsequent 2 weeks, the V3 Miniscope baseplate was implanted over the ACC injection site. Animals were introduced to the 48 x 48 cm behavioral arena and gradually acclimated to the weight of the scope by using dummy scopes of increasing weight over a 7-10 day period. Silicon based, dense-electrode probes (Yang et al., 2020) were implanted and affixed into the RCrus I PC layer or DN and secured into place with dental cement. We made the first set of recordings ~24 hours after implantation of the probes (**Figure 1B, C**). Prior to implantation, the probes were coated with Dil (#C7000, Thermo Fisher Scientific) to enable post hoc confirmation of the probe's anatomical location (**Figure 1C**). For each mouse, we recorded approximately 200 ACC neurons using calcium imaging (**Figure 1D**) and 1-9 cerebellar neurons using dense electrode arrays (**Figure 1E**). The freeware analysis program Kilosort2/Phy2 was used to isolate single PC and DN units from recordings (**Figure 1F, G**). P-sort open-source software was used for PCs, which were identified by the presence of complex spikes (CS) along with the simple spikes (SS) in the recordings (**Figure 1G**) (Sedaghat-Nejad et al., 2021).

### **E-Scope recordings of cerebellar activity during social and object interactions**

Implanted animals were placed into the behavioral arena for 1 minute before the introduction of either another novel male C57BL/6J mouse or a 3D printed object (cone or cube) for 7 minutes. Subsequently, the animal was removed from the behavior arena for 1 minute while the arena was cleaned. The recorded animal was then reintroduced to the arena and introduced to a novel mouse or object for another 7 minutes in a counterbalanced manner. Recorded animals made more contact with the other mouse than with the object (**Figure 2A**), suggesting a normal preference for social contact with the E-Scope attached.

We recorded SS from a total of 28 PCs during both social and object interaction (**Figure 2B, G**). We used receiver operating characteristics (ROC) analysis to measure the area under the curve (AUC) value which quantified the overlap of activity with binarized vectors characterizing whether the animal was socially interacting or not interacting with the other animal; these values were in turn compared to circularly shuffled controls to identify units significantly modulated by social or object interaction. Nearly one-third of the PCs (28.5%,  $n = 8$ ) were robustly inhibited by social interaction (**Figure 2D, E, G**) while only 3 PCs (10.7%) were excited during social interaction (**Figure 2D**). The remaining non-significant (nsPC) units were not modulated (**Figure 2F**). Neurons inhibited by social interaction were inhibited for 1-3 sec (**Figure 2C, E**), which was far longer than the SS pause typically induced by CSs (20 - 100 ms) (**Figure 1G**). The same procedure revealed only 2 significantly modulated cells (7.1%) in both object interaction excited and inhibited groups (**Figure 2 – figure supplement 1**).

Conversely, most DN neurons significantly modulated by social interaction were excited. Out of 99 DN neurons recorded, 20 neurons (20.2%) were excited during social interaction (Soc+ DN), 12 neurons (12.1%) were inhibited (Soc- DN) and the remaining 67 were not significantly modulated (nsDN) (**Figure 2I-N**). The excitation was more robust than inhibition and firing rates were increased for 2 - 4 sec post interaction onset. The DN cells recorded in the object interaction sessions ( $n = 85$ ) showed smaller responses compared to the social interaction with 10 (11.7%) and 6 (7.05%) excited and inhibited units respectively (**Figure 2 – figure supplement 2**).

Cerebellar PCs have been reported to have different modules that operate at different baseline SS frequencies (H. Zhou et al., 2014). These modules have also been shown to modulate bidirectionally during learning (de Zeeuw, 2021). We therefore analyzed the mean firing rate during non-social events for PCs and DN neurons. DN neurons did not show any difference ( $F = 1.589$ ,  $p = 0.2172$ ) in mean firing rate between Soc+ and Soc- groups and the bimodal rate distribution of the DN neurons were not related to the waveform properties (**Figure 2 – figure supplement 3A**,

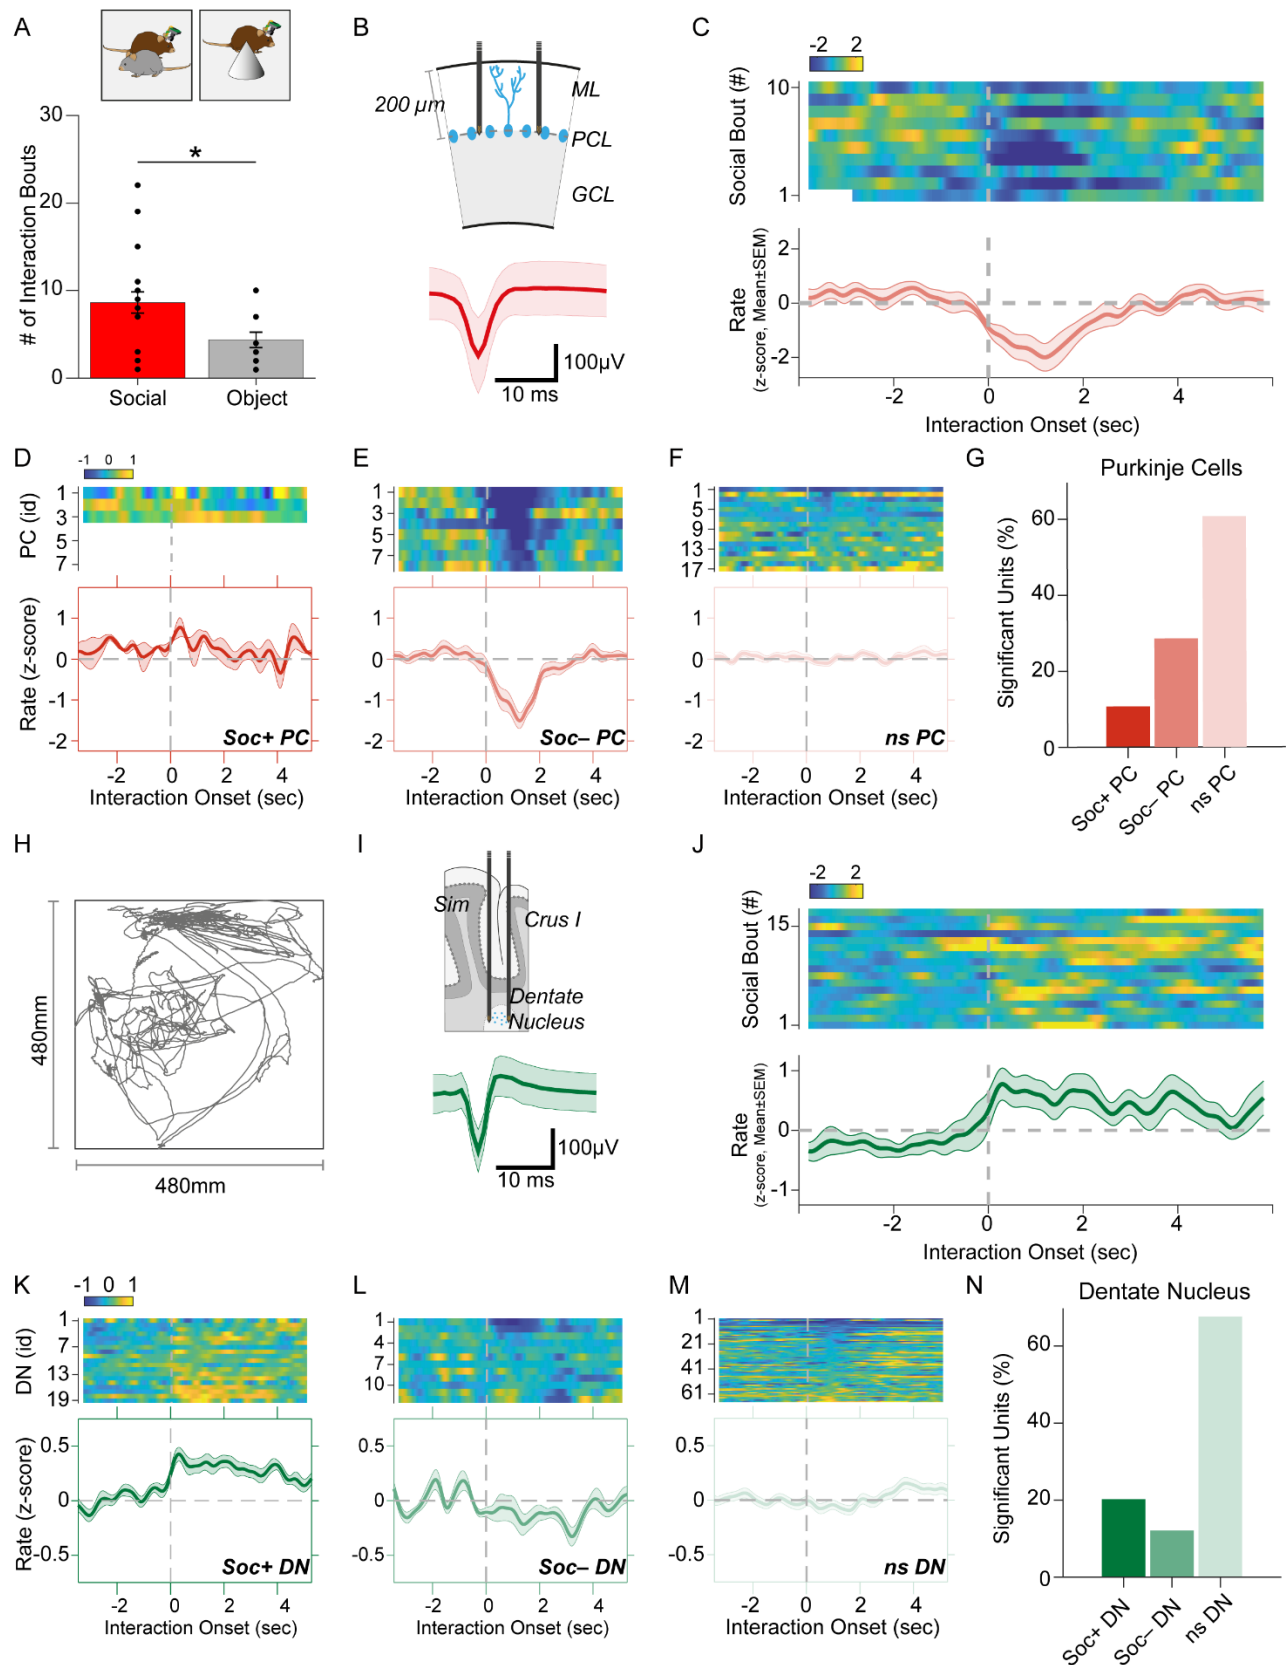

**Figure 2. Purkinje cell and dentate nucleus neuron activity patterns during social behavior.**

**(A)** Graph of the number of interaction bouts between the recorded subject mouse and a novel target mouse or object (*two-sided Wilcoxon rank sum test*;  $p = 0.0245$ ,  $Z = 2.2485$ ) **(B)** Illustration of probe location in the PC layer (*top*). Average simple spike waveform of a PC (*bottom*). **(C)** Heatmap of normalized (Z-score) firing rates of a Soc- PC neuron aligned to the onset of social interaction shown for 10 interaction bouts (*top*). The mean normalized firing rate across all interaction sessions shown above (*bottom*). **(D, E, F)** Average activity of 3 Soc+ PCs **(D)**, 10 Soc- PCs **(E)**, and 17 ns PCs **(F)**. The mean activity of each group

is shown below each heat map. **(G)** Proportion of Soc+, Soc- and ns PCs in the recorded population. **(H)** Illustration showing the path of the recorded animal in the social interaction arena (480 x 480 mm). **(I)** Illustration of probe location for DN recordings (*top*). Average spike waveform of a DN neuron (*bottom*). **(J)** Normalized firing rates of a Soc+ DN neuron aligned to the onset of social interaction shown for 18 interaction bouts (*top*). The mean normalized firing rate across all interaction sessions shown above. **(K, L, M)** Average activity of 19 Soc+ DN neurons **(K)**, 10 Soc- DN neurons **(E)**, and 63 ns DN neurons **(F)**. The mean activity of each group is shown below each heat map. **(N)** Proportion of Soc+, Soc- and ns DN neurons in the recorded population.

**B).** However, PCs showed a clear difference ( $F = 5.742$ ,  $p = 0.04$ ) in mean firing rate between the two socially responding types (**Figure 2 – figure supplement 3C, D**).

Social and object interactions are often coupled with locomotion and head rotational changes, which are especially relevant to cerebellar activity. Thus, we further investigated the possibility that PCs and DN neurons encode movement-related activity. First, we examined the body speed and angular head velocity at the onset of social interaction. In the sessions recorded, we found that mice tended to reduce their speed and head angular velocity upon interaction (**Figure 2 – figure supplement 4A, B**). Analysis of the Soc+ and Soc- PCs as well as DN neurons showed no significant change in activity upon onset (**Figure 2 – figure supplement 4C, D**) or offset (**Figure 2 – figure supplement 4E, F**) of locomotion. In addition, head rotation onset had no relationship to PC or DN activity in Soc+ or Soc- groups (**Figure 2 – figure supplement 4G, H**). Therefore, the activity changes we observed in cerebellar neurons at the onset of social interactions are unlikely to be related to motor aspects of behavior during social interactions. Overall, the electrophysiological responses in the cerebellum during social interaction are predominantly composed of PC inhibition and DN excitation. These results are consistent with the cerebellar anatomical circuit, where simultaneously decreased PC activity would be predicted to disinhibit DN neurons, thus resulting in excitatory output from the cerebellum to downstream brain areas (Lee et al., 2015).

### **E-Scope calcium imaging of ACC neuron activity during social and object interaction**

To determine how the cerebellar neurons communicate with ACC neurons during social interaction, we performed calcium imaging of ACC neurons (**Figure 3A**) synchronously with the electrophysiological recordings in cerebellum discussed above using the E-Scope. We again used ROC analysis and circularly shuffled controls to determine whether ACC neurons were excited, inhibited, or not significantly modulated by social or object interactions (**Figure 3B-F, Figure 3 – figure supplement 1**). We recorded 4868 and 3149 neurons during social and object interaction sessions, respectively. Of the recorded cells, 3.6% of ACC neurons were socially excited (**Soc+ ACC; Figure 3B, D, F**), and 5.2% were socially inhibited (**Soc- ACC; Figure 3C, E, F**). These proportions were greater than what would be expected by chance given the criteria for AUC significance ( $p < 0.025$ ). Conversely, 4.1% and 8.4% of ACC neurons were excited or inhibited by object interactions, respectively (**Figure 3G, H, Figure 3 – figure supplement 1**). The overlap of neurons significantly excited or inhibited by both social and object interactions was 0.1% and 0.4% of all neurons, respectively. Therefore, a significant proportion of non-overlapping ACC neurons were excited or inhibited by social and object interactions.

Finally, we assessed whether ACC neuron activity is correlated with locomotion or changes in head angular momentum. Similar to our observation in cerebellum, ACC activity showed no significant correlation with movement at the onset or offset of locomotion or head rotation (**Figure 3 – figure supplement 2**).

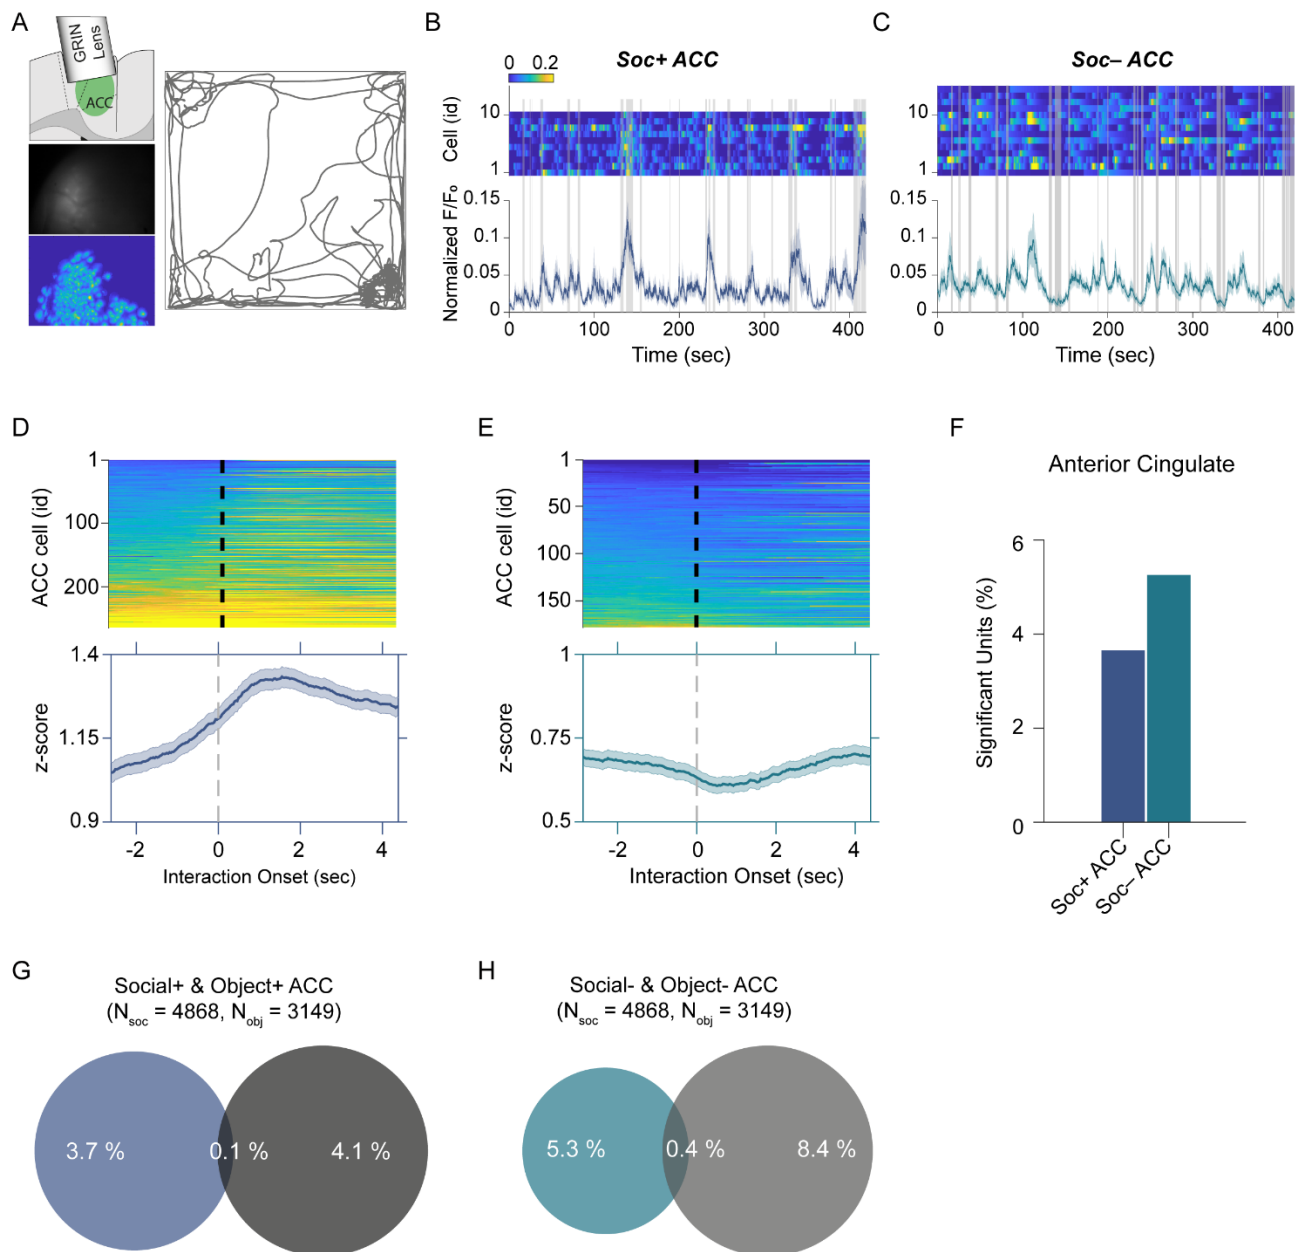

**Figure 3. ACC neuron activity patterns during social behavior.**

(A) Illustration of GRIN lens implant location (*top left*). Raw image from ACC calcium imaging recording (*middle left*). Segmented and averaged activity heatmap from the recording shown above (*bottom left*). Example of raw behavioral trace of subject mouse (*right*). (B, C) Heatmap depicting the calcium activity of 10 Soc+ ACC neurons (B) and 15 Soc- ACC neurons (C) during a single social interaction session. Social interaction bouts are shown as gray bars. The average calcium activity is shown below each heatmap. (D, E) *Top*: Z-scored Soc+ (D) and Soc- (E) ACC neurons calcium activity for all neurons during all social interaction sessions. The onset of social interaction is marked as a dashed black line. *Bottom*: Mean of Z-scored activity shown for the heatmaps above for Soc+ (D) and Soc- (E) neurons. (F) Percentage of units showing significant modulation by social interaction. (G) Overlap of Soc+ and Obj+ ACC neuronal populations. (H) Overlap of Soc- and Obj- ACC neuronal populations.

### Correlated activity in the cerebellar-cortical circuit

To understand the relationship between cerebellum and ACC modulation during social interaction and non-social bouts, we performed correlation analyses between the different cell types in the two regions. Previous reports indicate the cerebellum indirectly connects to the ACC via the ventral medial thalamus (Figure 4A), but it is not clear whether this indirect connection drives ACC firing

during social bouts (Badura et al., 2018; Kelly et al., 2020). We therefore calculated the distribution of correlation coefficients of activity during both the social interaction bouts as well as during the non-social (off-bouts) periods for different PC-ACC and DN-ACC cell pairs depending on their modulation by social interaction (**Figure 4B, C**). Overall, as expected, cerebellar PC and DN neurons and ACC neurons that were similarly modulated by social interaction showed higher correlation values compared to cell pairs that were modulated in opposite directions (**Figure 4D-G**). On the other hand, nsPC or nsDN activity correlation distributions with all ACC groups were similar

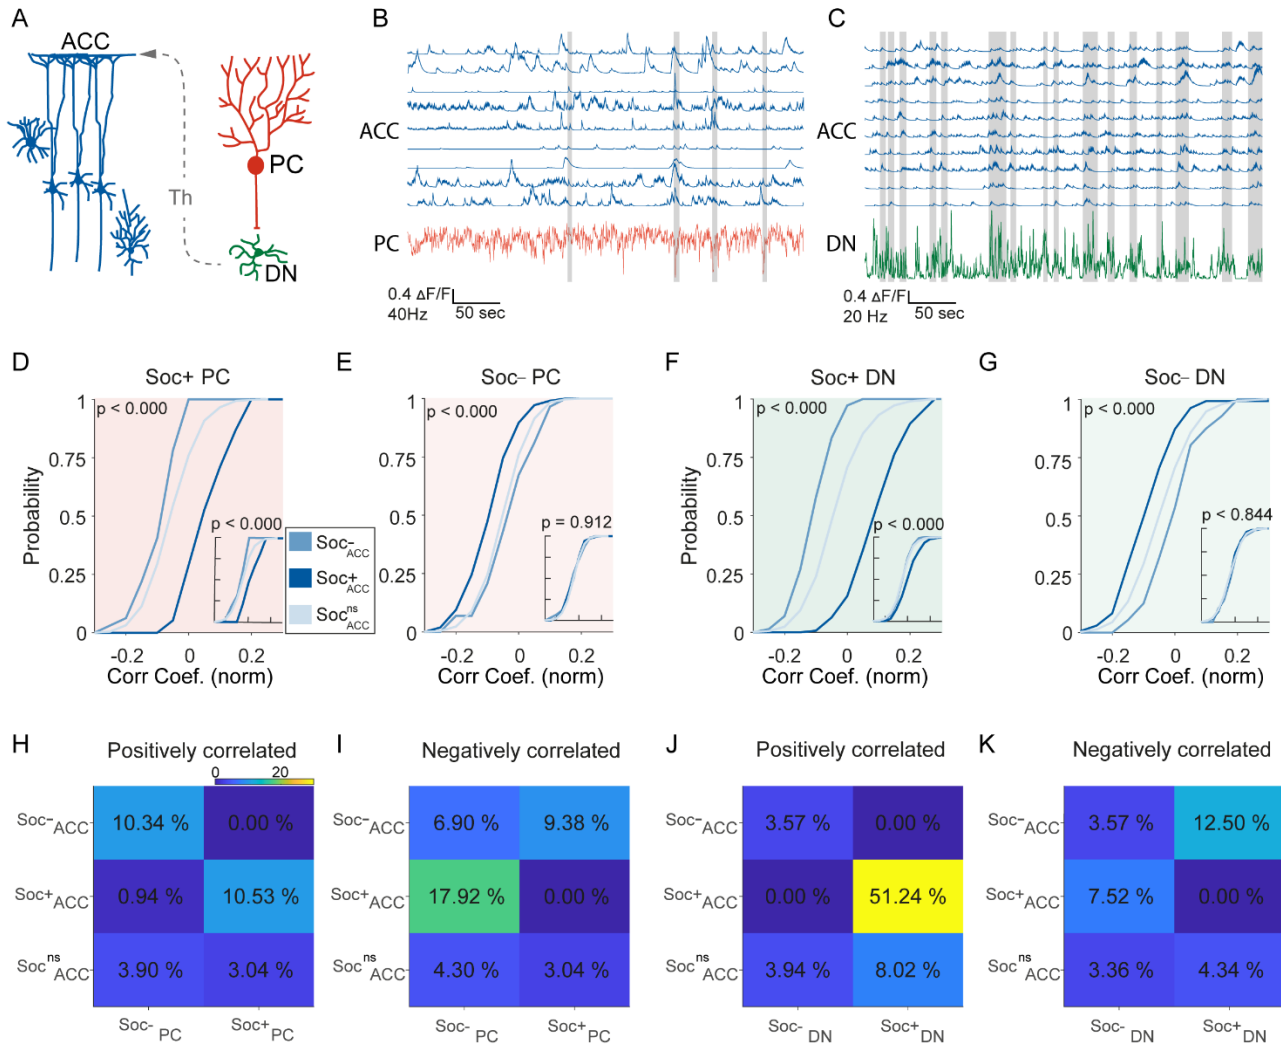

**Figure 4. Correlated activity in the cerebellar-cortical circuit during social behavior.**

(A) Illustration of the cerebellar-cortical circuit. PCs provide converging inhibition to DNs that excite thalamic neurons. Thalamic neurons excite ACC neurons. (B) Simultaneously recorded calcium traces from 9 ACC neurons and the electrophysiologically recorded firing rate of a single PC (red) during a social interaction bout. Social interaction bouts are shown as gray bars. (C) Simultaneously recorded calcium traces from 10 ACC neurons (blue) and the electrophysiologically recorded firing rate of a single DN neuron during a social interaction bout. Social interaction bouts are shown as gray bars. (D-G) Cumulative histogram of the distribution of the correlation coefficients for the activity of (D) Soc+ PCs, (E) Soc- PCs, (F) Soc+ DNs, or (G) Soc- DNs with Soc+ (dark blue), Soc- (light blue), and Soc<sup>ns</sup> (blue gray) ACCs. *Insets*: cumulative histogram of the activity of each set of neurons calculated during periods when the mouse was not engaged in social interaction. (H, I, J, K) Correlation matrix showing percentage of cell pairs showing significant positive (H, J) or negative (I, K) correlations in activity between Soc+ and Soc- PCs (H, I) or Soc+ and Soc- DNs (J, K) with Soc+, Soc- and Soc<sup>ns</sup> ACC neurons. The color of the squares represents the proportion of neurons correlated.



**(Figure 4 – figure supplement 1I, J & 2).** These patterns were largely consistent when the proportion of neurons significantly correlated was calculated between the differently-modulated cell types in cerebellum and ACC (**Figure 4I-K**). Interestingly, these differences almost entirely disappeared when only non-social bouts were analyzed (**Figure 4D-G insets**). Pairwise comparisons of correlation coefficients recorded in the same socially modulated cell pairs with social bouts included and excluded supported our findings (**Figure 4 – figure supplement 1 A-H**). These findings suggest that correlated activity is largely driven by social interactions and not by the intrinsic connectivity of these neuronal groups.

## **Discussion**

Social interaction between animals involves a complex set of behaviors that involves the integration of multimodal information and communication between several brain areas. Here, we provide a new perspective on the physiology of the cerebellum during social interaction and how it communicates with downstream brain regions. To faithfully record this synchronized activity, we developed a new device (E-Scope) to record two remote but functionally connected regions of the brain via calcium imaging and electrophysiology. We show that the majority of RCrus I PCs modulated by social interaction decrease their SS firing activity. Conversely, most modulated DN neurons increased their firing rate during social interaction, consistent with disinhibition of DN firing by simultaneous decreases in PC SS firing rate. In vivo calcium imaging during social interaction showed that less than 10 percent of ACC neurons were modulated by social interaction with the majority of neurons being inhibited. As expected, cerebellar and ACC neurons similarly modulated by social interaction showed higher correlations in their firing rate than cerebellar and ACC neurons that were modulated in opposite directions. These differences in correlated firing largely disappeared when only non-social bouts were analyzed, indicating that correlations were dependent on social behavior and not on the intrinsic indirect connectivity of the two brain regions.

### **The E-Scope: An integrated device for simultaneous calcium imaging and electrophysiology**

The development of the miniature microscope (Ghosh et al., 2011) in conjunction with the invention of highly sensitive and robust genetically encoded calcium indicators (Chen et al., 2013; Nakai et al., 2001) has allowed the recording of activity in large populations of neurons in freely behaving mice. Open-source miniaturized microscopes (Aharoni et al., 2019; Cai et al., 2016) have expanded access to this tool and encouraged new developments in Miniscope technology including the development of wire-free (Shuman et al., 2020) and large field of view miniaturized microscopes (C. Guo et al., 2021). In recent years, a miniaturized microscope called the NINscope was developed for multi-region recording of calcium signals (de Groot et al., 2020), allowing simultaneous calcium imaging of complex spike activity in the cerebellum and motor cortical activity during free behavior. However, calcium imaging in PCs provides only a partial picture of their activity, as it reports only the rate of CSs, but not the dynamic and persistent SS firing that is characteristic of these fast-spiking neurons. Here, we introduce the E-Scope, which can synchronously acquire calcium imaging data from one area and electrophysiological data from another to allow simultaneous examination and integration of electrical, calcium, and behavioral data streams. The E-Scope also provides method flexibility, allowing simultaneous recordings with areas where implanting a lens may be too invasive, such as deep brain regions like the DN where lens implantation would require the removal of its input layer in the cerebellar cortex. Furthermore, the E-Scope can be used to record local field potentials from any brain region, regardless of depth, simultaneously with calcium imaging. This approach therefore provides a unique tool to identify neurons activated during different oscillations critical for memory consolidation and cognition such as ripple and theta oscillations in the hippocampus or spindle oscillations in the cortex. Additionally, the integration of data streams and Miniscope power into a thin single coax cable is less limiting to the physical movement of the animal than multiple wires, enabling better interpretation of physiological correlates of behavior. Moreover, the E-Scope can be used with multiple different

extracellular electrophysiological recording techniques including silicon microprobes as shown here, as well as tetrode arrays (Howe & Blair, 2022) or flexible electrode arrays (Chung et al., 2019). Several approaches now exist for linking different types of electrodes to GRIN lenses for simultaneous electrophysiological recordings and calcium imaging from the same brain region (Cobar et al., 2022; McCullough et al., 2022; Wu et al., 2021). The E-Scope would be able to couple with these electrode systems and imaging systems as well.

## **Electrophysiological recordings demonstrate reciprocal social modulation between RCrus I PCs and DNs**

Lesion and imaging studies in humans have suggested that the cerebellum's role extends beyond motor control and that the cerebellum may be important for social behavior (Schmahmann, 1998b; Sokolov et al., 2017). In fact, cerebellar abnormalities are one of the most replicated anatomical changes in brains of individuals with autism (Fatemi et al., 2012). A causal role for the cerebellum in social behavior was further solidified when specific genetic or activity modulations of RCrus I had dramatic effects on social behavior (Badura et al., 2018; Kelly et al., 2020). Yet, how distinct cerebellar cell types in this brain region are modulated by social interaction is not known as it requires direct electrophysiological recordings from cerebellar neurons in freely behaving animals. Our study is the first to demonstrate physiological cerebellar PC and DN neuron activity during social interaction in freely behaving animals. We find that most socially modulated PC neurons in RCrus I are inhibited. The mechanisms driving prolonged inhibition of PC firing during social interaction is still not clear. This inhibition lasts far longer than would be expected from post-complex spike pauses in activity. One potential mechanism could be coordinated decreases in cerebellar granule cell activity during social interaction dynamically decreasing excitatory input to PCs and therefore reducing PC SS firing. Alternatively, inhibition of PC firing rate may be due to an increase in inhibitory versus excitatory input from molecular layer interneurons (MLIs) versus granule cells, respectively. A process that could be driven by LTP and LTD of the corresponding synapse during learning. Previous *in vivo* studies have shown that sensory stimulation can increase MLI activity (Jörntell & Ekerot, 2003) and therefore social sensory input such as olfactory stimuli could potentially increase MLI firing. This potential mechanism of PC inhibition is supported by experiments where suppression of Crus I MLIs causes changes in social preference (Badura et al., 2018), suggesting that MLI output may play a prominent role in modulating PC output and therefore DN output during social behavior. Future recordings from cerebellar granule neurons or MLI neurons during social interaction will be necessary to answer these questions.

Bidirectional modulation of activity in the cerebellum is a well-known phenomenon (de Zeeuw, 2021). We found bidirectional modulation of PC firing during social interaction with the majority of PCs inhibited by social interaction and a minority excited. Consistent with the inhibitory role of PCs onto DNs, we find this ratio to be inverted in DNs with the majority of modulated DNs excited and only minority inhibited. As PC's receives inputs from parallel fibers, which convey proprioceptive, peripheral sensory and motor related information (Gao et al., 2018), we performed analysis to demonstrate that our social activity modulations were not simply related to motor behavior. Movement of the animal at the onset, offset, or changes in locomotion direction could not explain the modulations of activity we recorded in the cerebellum, suggesting that activity modulations were driven specifically by social interaction. In addition, there was little overlap in the neurons modulated by social interaction and by object interactions. This indicates that RCrus I activity is responsive to elements of social interaction itself, although the specific information encoded is still to be ascertained.

## **Correlated firing between PCs, DNs and ACC neurons**

An indirect connection links RCrus I cerebellum to ACC via the thalamus (Badura et al., 2018). DN neurons project to the ventromedial thalamus, which in turn projects to the ACC (de Lima et al., 2022; Kuramoto et al., 2015). As expected, we find that correlations between PCs or DNs with ACC neurons are greater when these neurons are similarly modulated by social interaction.

However, these differences in correlations disappear when only non-social bouts are analyzed, suggesting that spontaneous activity during non-social behavior and the intrinsic connectivity of the two regions is not sufficient to impose differences in correlations without social interaction. These results suggest that communication between the cerebellum and ACC is coordinating social behavior. However, future studies are necessary to understand more fully what the specific behaviorally relevant signals are that are being output from the cerebellar circuit to the ventromedial thalamic neurons and then to the ACC.

Our findings support the theory that the cerebellum plays a role in social behavior. Moreover, the E-Scope provides an important tool for examining the activity of two distant brain regions during behavior. We have further uncovered how cerebellar activity indirectly impacts ACC neuron output during social behavior and non-social behavior. These physiological insights into cerebellar and ACC communication during social behavior may eventually provide ways to finely tune cerebellar activity in autism models and eventually in humans to augment and improve the quality of social interactions.

## **Methods**

### **E-Scope parts and assembly**

A two-shank, 64 channel silicon probe (64H with 32 channels activated) was used that was wire bonded and epoxied onto a probe PCB (PCB: Hughes Circuits, assembly: IDAX Microelectronics). The probe PCB that incorporated the ground wire was connected to a slimstack connector (Molex) via a flat flex cable (**Figure 1 – figure supplement 1A**). The male slimstack connector on the probe was then connected to the female slimstack connector Ephys PCB (**Figure 1 – figure supplement 1B**). This Ephys PCB incorporated a 32-channel electrophysiology integrated chip (Intan, RHD2132) and a 32 bit ARM-Cortex microcontroller unit (MCU) (Atmel; ATSAMS70N21A). This MCU configures the Intan electrophysiology chip and polls it using Direct Memory Access (DMA) over a single ended Serial Peripheral Interface (SPI) at up to 20 kSps per channel for new electrophysiology data across its 32 channels. The MCU then repackages the serialized electrophysiology data into 512 bit-long packets, containing one 16-bit sample for each of the 32 channels. These data packets are then clocked out by the E-Scope's image sensor pixel clock using the MCU's Synchronous Serial Controller (SSC) and DMA. The resulting timing and structure of the electrophysiology data allows for this data to be further serialized with the image sensor data due to all data now sharing the same acquisition clock, namely the image sensor pixel clock. The Ephys PCB was connected through a 6-wire cable assembly soldered between the Ephys PCB and the V3 CMOS PCB (**Figure 1A & Figure 1 – figure supplement 1C**), allowing integration and synchronization of electrophysiological and imaging data. The wires connecting the Ephys PCB to the CMOS PCB were fixed in place using hot melt adhesive to protect the wires during behavior. A single, flexible, 1.1 mm diameter, coaxial cable (Cooner Wire, CW2040-3650SR) connected the integrated E-Scope with all off-board power and DAQ hardware. This single cable supplies the E-Scope with power, carries low-bandwidth bidirectional communication data, and carries unidirectional high-bandwidth synchronized imaging and electrophysiology data to an open-source UCLA Miniscope DAQ connected by a coaxial SMA connector (**Figure 1 – figure supplement 1D**). Miniscope imaging data acquired by the Miniscope DAQ was sent over USB using a USB Video Device (UVC) protocol while electrophysiology data carried over the coaxial cable was routed from the UCLA Miniscope DAQ to an Intan DAQ (RHD 2000 evaluation board) via an intermediary circuit used to mimic a standard 32 channel Intan headstage (**Figure 1 – figure supplement 1D-G**). This intermediary circuit and PCB has the same MCU that is on the Ephys PCB and effectively undoes the timing and packeting steps implemented on the E-Scope as well as emulates the registers of the Intan electrophysiology amplifier chip and converts single ended SPI to LVDS SPI (**Figure 1 – figure supplement 1E**). These two acquisition systems were then synchronized together using the "frame sync" output signal from the Miniscope DAQ as a digital input to the Intan

DAQ. This served as a common low voltage transistor-transistor logic (LVTTL) signal for each Miniscope frame acquired by the Miniscope DAQ and enabled alignment of electrophysiology and image data offline. The components necessary for building an E-Scope are listed in **Table 1**.

## Animals

6-8 week-old C57BL/6J young adult male mice at the time of initial surgery were used for in vivo E-Scope calcium imaging and electrophysiology experiments. All mice were acquired from Jackson Laboratories and group-housed 3 mice per cage on a 12 h light-dark cycle. For all behavioral experiments, aged matched novel animals were used. All experimental protocols were approved by the Chancellor's Animal Research Committee of the University of California, Los Angeles in accordance with the US National Institutes of Health (NIH) guidelines.

## Viral vectors

Stereotaxic injections for E-Scope experiments were done using a stereotaxic frame (David Kopf Instruments) and a Nanoject II microinjector (Drummond Scientific). For Miniscope calcium imaging experiments, AAV1. Syn.GCaMP6f.WPRE.SV40 virus (titer  $4.5 \times 10^{13}$  GC/mL; Penn Vector Core) was injected.

## In vivo E-scope surgeries

Mice were anesthetized with 1.5-2.0% isoflurane and placed into a stereotaxic apparatus (David Kopf Instruments) for all surgeries. Once the depth of anesthesia was confirmed by the absence of reflex, the mouse was moved to a heat pad (Harvard Apparatus) on the stereotaxic frame. The ear bars were firmly fixed onto the skull of the mouse. Eye ointment was applied to protect the eyes from drying. Hair was shaved off and incision sites were sterilized with multiple iterations of ethanol and beta-iodine before going into surgery.

The mouse skull was calibrated so that the bregma and lambda were aligned and on the same plane. AAV1. Syn.GCaMP6f.WPRE.SV40 virus was injected in the ACC (Anteroposterior: 0.9 mm, Mediolateral: 0.2 mm, Dorsoventral: -1.3 mm relative to bregma; 300 nL) using a Nanoject II microinjector (Drummond Scientific) at  $60 \text{ nl} \cdot \text{min}^{-1}$ . The location of the DN (Anteroposterior: -5.8 mm, Mediolateral: -2.25 mm relative to bregma) or RCrus I (Anteroposterior: -6.5 mm, Mediolateral: -2.5 mm relative to bregma) was labeled for later access. The incision site was sutured using silk suture threads (#18020-00, Fine Science Tools). Mice were given carprofen analgesic ( $5 \text{ mg} \cdot \text{kg}^{-1}$ ) for 3 days and amoxicillin antibiotic ( $0.25 \text{ mg} \cdot \text{ml}^{-1}$ ) through *ad libitum* water supply for 3 days.

After a week of recovery, mice underwent relay GRIN lens (Inscopix; PN 130-000143) implant surgery. After sterilizing the scalp, an incision was made to expose the skull. A skull screw and a ground pin were fastened to the skull, followed by a craniotomy with a diameter of 1 mm was made above the virus injection site. The tissue above the targeted implantation site was carefully aspirated using a 30-gauge blunt needle. Buffered ACSF was constantly applied throughout the aspiration to prevent the tissue from drying. Aspiration ceased after the target depth (0.7 mm) had been reached and full termination of bleeding. Here, a 1 mm relay GRIN lens (1 mm diameter, 4 mm length, Inscopix) was stereotaxically lowered and implanted at a 10 degree angle to the target site (-0.7 mm dorsoventral from the skull surface relative to the most posterior point of the craniotomy). Cyanoacrylate adhesive (Vetbond, 3M) and dental cement (Ortho-Jet, Lang Dental) were applied to fix the lens in place as well as to cover the exposed skull. Kwik-Sil was used to protect the protruding relay GRIN lens. Carprofen ( $5 \text{ mg} \cdot \text{kg}^{-1}$ ) and dexamethasone ( $0.2 \text{ mg} \cdot \text{kg}^{-1}$ ) were administered subcutaneously during and after surgery along with amoxicillin ( $0.25 \text{ mg} \cdot \text{ml}^{-1}$ ) in the drinking water for 3 days.

Mice were anesthetized again 2 weeks subsequently. A baseplate locked to a Miniscope containing an objective GRIN lens (2 mm diameter, 4.79 mm length, 0.25 pitch, 0.50 numerical aperture, Grintech) was placed above the relay lens to search for the optimal in-focus cells in the field of view. Once field of view was obtained, the baseplate was cemented in place and the

Miniscope was unlocked and detached from the baseplate. A plastic cap was attached on top of the baseplate to prevent debris build-up.

Mice were anesthetized for the fourth time for silicon multichannel electrode probe implantation, which were manufactured using the same process previously reported by Shobe et al. (2005). The 2-shank 32 channel silicon probe PCB was screwed to a holder and coated with Dil (#C7000, Thermo Fisher Scientific) prior to insertion. A 1 mm diameter craniotomy was made on the previously marked DN or RCrus I locations. A micro-incision was made in the dura for the probe to go in. The probe was slowly lowered to the target locations (DN: -2.0 mm or RCrus I: 200-250  $\mu$ m) where optimal signal-to-noise ratio was obtained and waited for the probe to settle in the brain for more than 30 minutes. Once location was set, the probe was dental cemented into place. Mice were given carprofen and dexamethasone post-surgery for 3 days along with amoxicillin in drinking water.

### **Habituation**

Subject mice were habituated with a dummy Miniscope which had the equal amount of weight as the E-Scope for 7-10 days prior to multichannel silicon probe implant. Weights (0.55 g/piece; DILB8P-223TLF, Digi-Key Electronics) were increased 0.55 g every 2 days. Habituation was halted once the mice were active enough to carry the weight of the dummy Miniscope (4.5 g). All novel target mice were pre-habituated 15 mins each day, for 3 days to the arena prior to experiments.

### **Social behavior and data analysis**

Behavioral experiments were held in a low light (20-50 LUX) environment with white noise (50-3kHz). Subject mice were placed in a 48 x 48 cm arena for 1 minute prior to being introduced to either a novel object or novel target mouse. Social or object interactions were defined by the proximity between the subject mouse and novel target mouse or object (2 cm from the body, head or base of tail). A novel object or a novel target mouse was initially placed in the middle of the arena and introduced for 7 mins. Between each recording sessions, the arena was cleaned with 70% ethanol. Behavior sessions were recorded using a webcam (C920, Logitech) connected to the host computer using the Miniscope software.

Social interaction behavioral analyses were done by utilizing a custom Python script to trace the centroid of the body outline of both the subject and novel target mouse or object and tracking their proximity. We traced the LED on the Miniscope CMOS PCB located on the head of the subject mouse to calculate the speed and head angular speed. Statistical analysis was done on Prism (GraphPad software)

### **In vivo E-Scope recording and data analysis**

Recordings proceeded 2 days post probe implant. The body of the E-Scope was first connected to the Miniscope-DAQ (**Figure 1 – figure supplement 1**). Ground wires were set in place before powering the DAQ. The Miniscope-DAQ as well as the Intan DAQ were connected to the host computer. The UCLA Miniscope and Intan electrophysiology data acquisition programs were opened and run to confirm the imaging region of interest and electrophysiological signal quality. Next, the electrophysiological amplifier PCB was connected to the Miniscope via 6-wire cable assembly. The Miniscope portion of the E-Scope was fixed onto the baseplate of the mouse's head, followed by the connection of the electrophysiology amplifier PCB to the implanted probe in the mouse.

For cerebellar electrophysiological data analysis, spike sorting was performed by Kilosort 2.5 (Pachitariu et al., 2016) and P-sort (Sedaghat-Nejad et al., 2021). Isolated units were further manually curated in phy2 on other single unit activity criteria, in addition to merging and splitting highly similar and mixture units, respectively. Cross-correlogram between simple and complex spikes were constructed for the spike trains of the putative Purkinje cell units that revealed

signature complex spike induced simple spike pauses (**Figure 1 G**). Further analyses were done using custom script in MATLAB (MathWorks, 2018).

ACC calcium imaging analyses were done using the Miniscope Analysis pipeline (Etter et al., 2020). Videos went through NoRMCorre for motion correction (Pnevmatikakis & Giovannucci, 2017), then videos acquired during a session were concatenated to extract spatial components and calcium traces of individual neurons using CNMF-E (P. Zhou et al., 2018). Similar to electrophysiology analysis, the calcium traces were normalized and Z-score values were used to test for the social or object interaction- and movement-initiated activity.

To synchronize electrophysiology and calcium imaging data, we binned unit's spike trains using 33 ms bins to match with calcium traces recorded at ~30 Hz. Spike trains were further convolved with the Gaussian kernel with sigma of 100 ms. The spike rate maps were Z-scored for further analyses. Correlation analysis was computed using Pearson correlation (**Figure 4**), which was tested for significance by comparing correlations to those obtained from 1000 randomly circularly shifted calcium trace data. Cross correlation was computed between spike times and deconvolved signals.

## Histology

Post-hoc histology was performed to confirm the location of the silicon probe. Both silicon probe shanks were coated with Dil (#C7000, Thermo Fisher Scientific). After the recordings, mice were deeply anesthetized with isoflurane then cardiac perfused with phosphate-buffered saline (PBS) followed by 4% Paraformaldehyde (PFA; Sigma-Aldrich). Whole brains were carefully dissected and post-fixed into 4% PFA overnight and sliced using a vibratome (Leica VT1200). Coronal serial sections were made at a thickness of 70 $\mu$ m in a 4 °C PBS solution, mounted on a slide glass, and cover slipped with VECTASHIELD (H-1400, Vector Laboratories). We used the Paxinos Mouse Brain Atlas (Franklin & Paxinos, 2008) for nomenclature of brain regions. Images were taken using a widefield microscope (Apotome, Zeiss). Contrast, brightness, and pseudocolor were adjusted in Image J (Schneider et al., 2012). Images were tilted to align to illustration based on the atlas.

## Statistics

Statistical analyses were conducted using custom written scripts in MATLAB (MathWorks, 2018) and Prism (GraphPad software). No statistical methods were used to determine sample size. Sessions with no object interaction were excluded for electrophysiology and calcium imaging data analysis. Kolmogorov Smirnov normality test was applied before using Wilcoxon rank sum test for hypothesis testing. Non-parametric Kruskal-Wallis H test was used in some instances to cross validate significance for some of the supplementary figures. Otherwise, the t-test was used. P-value indicates one-tailed values and significance level of 0.01 was used unless stated otherwise.

## E-Scope Availability

All design files, software, parts list, assembly details and tutorials to build the E-Scope are available at [www.miniscope.org](http://www.miniscope.org) and <https://github.com/Aharoni-Lab/Ephys-Miniscope>.

## Acknowledgements

We thank Dr. Tom Otis for supporting this project. We are very thankful to Ebrahim Fegghi, Alejandro Hipolito, Jason Kwon, and Marcus Min for handling animals and the technical support. This work was supported by the VA Merit Award BX005202 (to PG), NSF NeuroNex Award 1707408 (to PG, DA, SM, and TB), NIH P50HD103577 (to PG and DA), NIH U01NS122124 (to PG and DA), NIH R01NS090930 (to PG), and NIH 1R61NS119708 (to PM).

## **Author contributions**

SWH and PG conceived of the project. DA developed the E-Scope. SWH and HTB validated the initial hardware. LY designed all the parts of the silicon probes. SM provided all the silicon probes. PM gave critical input on data analyses and its interpretation. SWH performed all experiments. SWH and KS analyzed the data and created figures. SWH, KS, PM, and PG wrote the manuscript.

## **Data and code availability**

The experimental data that support the findings of this study are available from Peyman Golshani ([pgolshani@mednet.ucla.edu](mailto:pgolshani@mednet.ucla.edu)), Sung Won Hur ([hurs0202@gmail.com](mailto:hurs0202@gmail.com)), or Karen Safaryan ([safaryan@ucla.edu](mailto:safaryan@ucla.edu)).

## **References**

1. Aharoni, D., Khakh, B. S., Silva, A. J., & Golshani, P. (2019). All the light that we can see: a new era in miniaturized microscopy. *Nature Methods*, *16*(1), 11–13. <https://doi.org/10.1038/s41592-018-0266-x>
2. Badura, A., Verpeut, J. L., Metzger, J. W., Pereira, T. D., Pisano, T. J., Deverett, B., Bakshinskaya, D. E., & Wang, S. S.-H. (2018). Normal cognitive and social development require posterior cerebellar activity. *eLife*, *7*. <https://doi.org/10.7554/eLife.36401>
3. Cai, D. J., Aharoni, D., Shuman, T., Shobe, J., Biane, J., Song, W., Wei, B., Veshkini, M., La-Vu, M., Lou, J., Flores, S. E., Kim, I., Sano, Y., Zhou, M., Baumgaertel, K., Lavi, A., Kamata, M., Tuszyński, M., Mayford, M., ... Silva, A. J. (2016). A shared neural ensemble links distinct contextual memories encoded close in time. *Nature*, *534*(7605), 115–118. <https://doi.org/10.1038/nature17955>
4. Carta, I., Chen, C. H., Schott, A. L., Dorizan, S., & Khodakhah, K. (2019). Cerebellar modulation of the reward circuitry and social behavior. *Science*, *363*(6424). <https://doi.org/10.1126/science.aav0581>
5. Chen, T.-W., Wardill, T. J., Sun, Y., Pulver, S. R., Renninger, S. L., Baohan, A., Schreiter, E. R., Kerr, R. A., Orger, M. B., Jayaraman, V., Looger, L. L., Svoboda, K., & Kim, D. S. (2013). Ultrasensitive fluorescent proteins for imaging neuronal activity. *Nature*, *499*(7458), 295–300. <https://doi.org/10.1038/nature12354>
6. Chung, J. E., Joo, H. R., Smyth, C. N., Fan, J. L., Geaghan-Breiner, C., Liang, H., Liu, D. F., Roumis, D., Chen, S., Lee, K. Y., Pebbles, J. A., Tooker, A. C., Tolosa, V. M., & Frank, L. M. (2019). Chronic Implantation of Multiple Flexible Polymer Electrode Arrays. *Journal of Visualized Experiments*, *152*. <https://doi.org/10.3791/59957>
7. Cobar, L. F., Kashef, A., Bose, K., & Tashiro, A. (2022). Opto-electrical bimodal recording of neural activity in awake head-restrained mice. *Scientific Reports*, *12*(1), 736. <https://doi.org/10.1038/s41598-021-04365-7>
8. de Groot, A., van den Boom, B. J., van Genderen, R. M., Coppens, J., van Veldhuijzen, J., Bos, J., Hoedemaker, H., Negrello, M., Willuhn, I., de Zeeuw, C. I., & Hoogland, T. M. (2020).

- NINscope, a versatile miniscope for multi-region circuit investigations. *ELife*, 9. <https://doi.org/10.7554/eLife.49987>
9. de Lima, M. A. X., Baldo, M. V. C., Oliveira, F. A., & Canteras, N. S. (2022). The anterior cingulate cortex and its role in controlling contextual fear memory to predatory threats. *ELife*, 11. <https://doi.org/10.7554/eLife.67007>
  10. de Zeeuw, C. I. (2021). Bidirectional learning in upbound and downbound microzones of the cerebellum. *Nature Reviews Neuroscience*, 22(2), 92–110. <https://doi.org/10.1038/s41583-020-00392-x>
  11. Devinsky, O., Morrell, M. J., & Vogt, B. A. (1995). Contributions of anterior cingulate cortex to behaviour. *Brain*, 118(1), 279–306. <https://doi.org/10.1093/brain/118.1.279>
  12. Etter, G., Manseau, F., & Williams, S. (2020). A Probabilistic Framework for Decoding Behavior From in vivo Calcium Imaging Data. *Frontiers in Neural Circuits*, 14. <https://doi.org/10.3389/fncir.2020.00019>
  13. Fatemi, S. H., Aldinger, K. A., Ashwood, P., Bauman, M. L., Blaha, C. D., Blatt, G. J., Chauhan, A., Chauhan, V., Dager, S. R., Dickson, P. E., Estes, A. M., Goldowitz, D., Heck, D. H., Kemper, T. L., King, B. H., Martin, L. A., Millen, K. J., Mittleman, G., Mosconi, M. W., ... Welsh, J. P. (2012). Consensus Paper: Pathological Role of the Cerebellum in Autism. *The Cerebellum*, 11(3), 777–807. <https://doi.org/10.1007/s12311-012-0355-9>
  14. Franklin, K., & Paxinos, G. (2008). The Mouse Brain in Stereotaxic Coordinates, Compact - 3rd Edition. In *Academic Press*.
  15. Gao, Z., Davis, C., Thomas, A. M., Economo, M. N., Abrego, A. M., Svoboda, K., de Zeeuw, C. I., & Li, N. (2018). A cortico-cerebellar loop for motor planning. *Nature*, 563(7729), 113–116. <https://doi.org/10.1038/s41586-018-0633-x>
  16. Ghosh, K. K., Burns, L. D., Cocker, E. D., Nimmerjahn, A., Ziv, Y., Gamal, A. el, & Schnitzer, M. J. (2011). Miniaturized integration of a fluorescence microscope. *Nature Methods*, 8(10), 871–878. <https://doi.org/10.1038/nmeth.1694>
  17. Guo, B., Chen, J., Chen, Q., Ren, K., Feng, D., Mao, H., Yao, H., Yang, J., Liu, H., Liu, Y., Jia, F., Qi, C., Lynn-Jones, T., Hu, H., Fu, Z., Feng, G., Wang, W., & Wu, S. (2019). Anterior cingulate cortex dysfunction underlies social deficits in Shank3 mutant mice. *Nature Neuroscience*, 22(8), 1223–1234. <https://doi.org/10.1038/s41593-019-0445-9>
  18. Guo, C., Blair, G. J., Sehgal, M., Sanguiliano Jimka, F. N., Bellafard, A., Silva, A. J., Golshani, P., Basso, M. A., Blair, H. T., & Aharoni, D. (2021). Miniscope-LFOV: A large field of view, single cell resolution, miniature microscope for wired and wire-free imaging of neural dynamics in freely behaving animals. *BioRxiv*, 2021.11.21.469394. <https://doi.org/10.1101/2021.11.21.469394>
  19. Hadland, K. A., Rushworth, M. F. S., Gaffan, D., & Passingham, R. E. (2003). The effect of cingulate lesions on social behaviour and emotion. *Neuropsychologia*, 41(8), 919–931. [https://doi.org/10.1016/S0028-3932\(02\)00325-1](https://doi.org/10.1016/S0028-3932(02)00325-1)



20. Howe, A. G., & Blair, H. T. (2022). Modulation of lateral septal and dorsomedial striatal neurons by hippocampal sharp-wave ripples, theta rhythm, and running speed. *Hippocampus*, *32*(3), 153–178. <https://doi.org/10.1002/hipo.23398>
21. Jörntell, H., & Ekerot, C.-F. (2003). Receptive Field Plasticity Profoundly Alters the Cutaneous Parallel Fiber Synaptic Input to Cerebellar Interneurons *In Vivo*. *The Journal of Neuroscience*, *23*(29), 9620–9631. <https://doi.org/10.1523/JNEUROSCI.23-29-09620.2003>
22. Kelly, E., Meng, F., Fujita, H., Morgado, F., Kazemi, Y., Rice, L. C., Ren, C., Escamilla, C. O., Gibson, J. M., Sajadi, S., Pendry, R. J., Tan, T., Ellegood, J., Basson, M. A., Blakely, R. D., Dindot, S. v., Golzio, C., Hahn, M. K., Katsanis, N., ... Tsai, P. T. (2020). Regulation of autism-relevant behaviors by cerebellar–prefrontal cortical circuits. *Nature Neuroscience*, *23*(9), 1102–1110. <https://doi.org/10.1038/s41593-020-0665-z>
23. Kuramoto, E., Ohno, S., Furuta, T., Unzai, T., Tanaka, Y. R., Hioki, H., & Kaneko, T. (2015). Ventral Medial Nucleus Neurons Send Thalamocortical Afferents More Widely and More Preferentially to Layer 1 than Neurons of the Ventral Anterior–Ventral Lateral Nuclear Complex in the Rat. *Cerebral Cortex*, *25*(1), 221–235. <https://doi.org/10.1093/cercor/bht216>
24. Lee, K. H., Mathews, P. J., Reeves, A. M. B., Choe, K. Y., Jami, S. A., Serrano, R. E., & Otis, T. S. (2015). Circuit Mechanisms Underlying Motor Memory Formation in the Cerebellum. *Neuron*, *86*(2), 529–540. <https://doi.org/10.1016/j.neuron.2015.03.010>
25. McCullough, C. M., Ramirez-Gordillo, D., Hall, M., Futia, G. L., Moran, A. K., Gibson, E. A., & Restrepo, D. (2022). GRINtrode: A neural implant for simultaneous two-photon imaging and extracellular electrophysiology in freely moving animals. *BioRxiv*, 2022.06.17.496591. <https://doi.org/10.1101/2022.06.17.496591>
26. Nakai, J., Ohkura, M., & Imoto, K. (2001). A high signal-to-noise Ca<sup>2+</sup> probe composed of a single green fluorescent protein. *Nature Biotechnology*, *19*(2), 137–141. <https://doi.org/10.1038/84397>
27. Pachitariu, M., Steinmetz, N., Kadir, S., Carandini, M., & Kenneth D., H. (2016). Kilosort: realtime spike-sorting for extracellular electrophysiology with hundreds of channels. *BioRxiv*, 061481. <https://doi.org/10.1101/061481>
28. Pnevmatikakis, E. A., & Giovannucci, A. (2017). NoRMCorre: An online algorithm for piecewise rigid motion correction of calcium imaging data. *Journal of Neuroscience Methods*, *291*, 83–94. <https://doi.org/10.1016/j.jneumeth.2017.07.031>
29. Schmahmann, J. (1998a). The cerebellar cognitive affective syndrome. *Brain*, *121*(4), 561–579. <https://doi.org/10.1093/brain/121.4.561>
30. Schmahmann, J. (1998b). The cerebellar cognitive affective syndrome. *Brain*, *121*(4), 561–579. <https://doi.org/10.1093/brain/121.4.561>

31. Schneider, C. A., Rasband, W. S., & Eliceiri, K. W. (2012). NIH Image to ImageJ: 25 years of image analysis. *Nature Methods*, 9(7), 671–675. <https://doi.org/10.1038/nmeth.2089>
32. Sedaghat-Nejad, E., Fakharian, M. A., Pi, J., Hage, P., Kojima, Y., Soetedjo, R., Ohmae, S., Medina, J. F., & Shadmehr, R. (2021). P-sort: an open-source software for cerebellar neurophysiology. *Journal of Neurophysiology*, 126(4), 1055–1075. <https://doi.org/10.1152/jn.00172.2021>
33. Shuman, T., Aharoni, D., Cai, D. J., Lee, C. R., Chavlis, S., Page-Harley, L., Vetere, L. M., Feng, Y., Yang, C. Y., Mollinedo-Gajate, I., Chen, L., Pennington, Z. T., Taxidis, J., Flores, S. E., Cheng, K., Javaherian, M., Kaba, C. C., Rao, N., La-Vu, M., ... Golshani, P. (2020). Breakdown of spatial coding and interneuron synchronization in epileptic mice. *Nature Neuroscience*, 23(2), 229–238. <https://doi.org/10.1038/s41593-019-0559-0>
34. Sokolov, A. A., Miall, R. C., & Ivry, R. B. (2017). The Cerebellum: Adaptive Prediction for Movement and Cognition. *Trends in Cognitive Sciences*, 21(5), 313–332. <https://doi.org/10.1016/j.tics.2017.02.005>
35. Stoodley, C. J., D’Mello, A. M., Ellegood, J., Jakkamsetti, V., Liu, P., Nebel, M. B., Gibson, J. M., Kelly, E., Meng, F., Cano, C. A., Pascual, J. M., Mostofsky, S. H., Lerch, J. P., & Tsai, P. T. (2017). Altered cerebellar connectivity in autism and cerebellar-mediated rescue of autism-related behaviors in mice. *Nature Neuroscience*, 20(12), 1744–1751. <https://doi.org/10.1038/s41593-017-0004-1>
36. van Overwalle, F., Manto, M., Cattaneo, Z., Clausi, S., Ferrari, C., Gabrieli, J. D. E., Guell, X., Heleven, E., Lupo, M., Ma, Q., Michelutti, M., Olivito, G., Pu, M., Rice, L. C., Schmahmann, J. D., Siciliano, L., Sokolov, A. A., Stoodley, C. J., van Dun, K., ... Leggio, M. (2020). Consensus Paper: Cerebellum and Social Cognition. *The Cerebellum*, 19(6), 833–868. <https://doi.org/10.1007/s12311-020-01155-1>
37. Wu, X., Yang, X., Song, L., Wang, Y., Li, Y., Liu, Y., Yang, X., Wang, Y., Pei, W., & Li, W. (2021). A Modified Miniscope System for Simultaneous Electrophysiology and Calcium Imaging in vivo. *Frontiers in Integrative Neuroscience*, 15. <https://doi.org/10.3389/fnint.2021.682019>
38. Yang, L., Lee, K., Villagrancia, J., & Masmanidis, S. C. (2020). Open source silicon microprobes for high throughput neural recording. *Journal of Neural Engineering*, 17(1), 016036. <https://doi.org/10.1088/1741-2552/ab581a>
39. Zhou, H., Lin, Z., Voges, K., Ju, C., Gao, Z., Bosman, L. W., Ruigrok, T. J., Hoebeek, F. E., de Zeeuw, C. I., & Schonewille, M. (2014). Cerebellar modules operate at different frequencies. *eLife*, 3. <https://doi.org/10.7554/eLife.02536>
40. Zhou, P., Resendez, S. L., Rodriguez-Romaguera, J., Jimenez, J. C., Neufeld, S. Q., Giovannucci, A., Friedrich, J., Pnevmatikakis, E. A., Stuber, G. D., Hen, R., Kheirbek, M. A., Sabatini, B. L., Kass, R. E., & Paninski, L. (2018). Efficient and accurate extraction of in vivo calcium signals from microendoscopic video data. *eLife*, 7. <https://doi.org/10.7554/eLife.28728>
